# Supplementary material for: Comparative Proteomic Analysis of Peritoneal Dialysate from Chronic Glomerulonephritis Patients
Source: Hindawi journal article supplement (doi:10.1155/2013/863860), 2013-01-01

**Supplementary Table A.** Clinical data of the 10 patients recruited in this study.**(1) Early Stage**

|                                         | <b>Reference range</b>                     | <b>P1</b> | <b>P2</b> | <b>P3</b> | <b>P4</b> | <b>P5</b> | <b>P6</b> | <b>P7</b> | <b>P8</b> | <b>P9</b> | <b>P10</b> |
|-----------------------------------------|--------------------------------------------|-----------|-----------|-----------|-----------|-----------|-----------|-----------|-----------|-----------|------------|
| Age (year)                              |                                            | 58        | 77        | 32        | 47        | 56        | 46        | 30        | 46        | 54        | 63         |
| Sex                                     |                                            | M         | M         | M         | F         | F         | F         | M         | M         | F         | F          |
| Hemoglobin (g/dl)                       | 11.6 – 14.8 (female)<br>13.5 – 17.5 (male) | 8.7       | 10.6      | 10.9      | 8.3       | 11.3      | 9.2       | 11.0      | 12.6      | 13.9      | 11.8       |
| Hematocrit (%)                          | 34 – 44 (female)<br>40 – 49 (male)         | 27.6      | 31.8      | 32.5      | 24        | 34        | 28.1      | 33.2      | 37.3      | 26.4      | 31.6       |
| White-cell count (per mm <sup>3</sup> ) | 3,200 – 9,200                              | 7400      | 6100      | 4800      | 6200      | 9200      | 7400      | 8500      | 5200      | 4600      | 6400       |
| Platelet count (mm <sup>3</sup> )       | 150,000 – 400,000                          | 152000    | 337000    | 151000    | 222000    | 371000    | 348000    | 224000    | 167000    | 263000    | 356000     |
| Blood urea nitrogen (mg/dl)             | 6 – 22                                     | 55        | 46        | 62        | 62        | 56        | 54        | 40        | 64        | 54        | 64         |
| Creatinine (mg/dl)                      | 0.6 – 1.3                                  | 9.6       | 13.6      | 11        | 12        | 11.9      | 9.5       | 5.3       | 8.3       | 10.2      | 9.8        |
| Fasting sugar (mg/dl)                   | 70 – 100                                   | 157       | 136       | 83        | 137       | 215       | 90        | 95        | 142       | 89        | 123        |
| Sodium (mEq/l)                          | 135 – 148                                  | 140.6     | 141.2     | 146.1     | 141       | 139.9     | 139.7     | 141.8     | 143.9     | 139.7     | 141.3      |
| Potassium (mEq/l)                       | 3.5 – 5.0                                  | 3.52      | 4.10      | 4.2       | 2.98      | 3.38      | 4.00      | 3.46      | 3.63      | 3.85      | 4.36       |

|                                         |         |    |    |    |    |    |    |    |    |    |    |
|-----------------------------------------|---------|----|----|----|----|----|----|----|----|----|----|
| Aspartate<br>aminotransferase<br>(IU/l) | 10 - 50 | 30 | 25 | 20 | 17 | 15 | 17 | 23 | 36 | 45 | 34 |
| Alanine<br>aminotransferase             | 10 – 50 | 38 | 23 | 9  | 13 | 13 | 13 | 28 | 23 | 24 | 16 |

## (2) Middle Stage

|                                            | Reference<br>range      | P1     | P2     | P3     | P4     | P5     | P6     | P7     | P8     | P9     | P10    |
|--------------------------------------------|-------------------------|--------|--------|--------|--------|--------|--------|--------|--------|--------|--------|
| Age (year)                                 |                         | 58     | 77     | 32     | 47     | 56     | 46     | 30     | 46     | 54     | 63     |
| Sex                                        |                         | M      | M      | M      | F      | F      | F      | M      | M      | F      | F      |
| Hemoglobin<br>(g/dl)                       | 11.6 – 14.8<br>(female) | 8.7    | 10.8   | 9.5    | 9.3    | 10     | 8.4    | 11.4   | 12.7   | 13.3   | 12.2   |
|                                            | 13.5 – 17.5<br>(male)   |        |        |        |        |        |        |        |        |        |        |
| Hematocrit (%)                             | 34 – 44<br>(female)     | 27.6   | 32.5   | 28.6   | 27.6   | 29.5   | 26     | 33.9   | 36.8   | 28.1   | 30.4   |
|                                            | 40 – 49 (male)          |        |        |        |        |        |        |        |        |        |        |
| White-cell count<br>(per mm <sup>3</sup> ) | 3,200 – 9,200           | 6700   | 5900   | 7300   | 7600   | 10300  | 5400   | 7100   | 6300   | 5200   | 7300   |
| Platelet count<br>(mm <sup>3</sup> )       | 150,000 –<br>400,000    | 178000 | 315000 | 250000 | 261000 | 335000 | 304000 | 165000 | 214000 | 289000 | 378000 |
| Albumin (g/dl)                             | 3.8 – 5.3               | 3.8    | 3.9    | 3.8    | 3.9    | 3.8    | 3.2    | 4.0    | 4.1    | 4.9    | 3.4    |
| Blood urea<br>nitrogen (mg/dl)             | 6 – 22                  | 58     | 68     | 59     | 59     | 40     | 54     | 57     | 67     | 55     | 69     |
| Creatinine<br>(mg/dl)                      | 0.6 – 1.3               | 10.1   | 13.7   | 12     | 10.19  | 14.17  | 9.24   | 7.56   | 8.8    | 11.6   | 10.1   |
| Fasting sugar                              | 70 – 100                | 144    | 91     | 85     | 90     | 106    | 91     | 84     | 145    | 91     | 131    |

|                                         |            |       |       |       |       |       |       |       |       |       |       |
|-----------------------------------------|------------|-------|-------|-------|-------|-------|-------|-------|-------|-------|-------|
| (mg/dl)                                 |            |       |       |       |       |       |       |       |       |       |       |
| Sodium (mEq/l)                          | 135 – 148  | 140.2 | 139.6 | 148.1 | 141.8 | 141.2 | 138.2 | 144.1 | 141.2 | 141.7 | 145.2 |
| Potassium<br>(mEq/l)                    | 3.5 – 5.0  | 3.7   | 4.20  | 3.69  | 3.68  | 4.86  | 5.01  | 3.83  | 4.25  | 3.27  | 4.83  |
| Aspartate<br>aminotransferase<br>(IU/l) | 10 – 50    | 27    | 19    | 17    | 15    | 23    | 15    | 21    | 32    | 41    | 33    |
| Alanine<br>aminotransferase<br>(IU/l)   | 10 – 50    | 31    | 21    | 13    | 10    | 21    | 15    | 17    | 21    | 26    | 21    |
| Calcium (mg/dl)                         | 8.4 – 10.2 | 8.7   | 9.7   | 9.7   | 9.9   | 9.8   | 8.4   | 9.2   | 8.8   | 9.2   | 9.5   |
| Phosphate<br>(mg/dl)                    | 2.3 – 4.7  | 4.2   | 6.5   | 4.9   | 4.1   | 7.3   | 6.0   | 4.2   | 5.2   | 6.7   | 4.9   |
| Bilirubin, direct<br>(mg/dl)            | 0 – 0.4    | -     | 0.05  | 0.05  | 0.03  | 0.08  | 0.05  | 0.22  | 0.24  | 0.22  | 0.05  |
| Uric acid (mg/dl)                       | 2.9 – 7.0  | 5.89  | 6.75  | 7.04  | 6.5   | 9.6   | 7.2   | 10.0  | 4.64  | 6.34  | 3.53  |

---

**Supplementary Table B.** Full protein names for the abbreviations in Figure 3.*1. Extracellular*

| Abbreviation               | Protein name                  | Gene Symbol |
|----------------------------|-------------------------------|-------------|
| <b>Alpha 1-antitrypsin</b> | Alpha-1-antitrypsin           | SERPINA1    |
| <b>APCS</b>                | Serum amyloid P-component     | APCS        |
| <b>APOA1</b>               | Apolipoprotein A-I            | APOA1       |
| <b>CRP</b>                 | C-reactive protein            | CRP         |
| <b>Fibrinogen gamma</b>    | Fibrinogen gamma chain        | FGG         |
| <b>HPRG</b>                | Histidine-rich glycoprotein   | HRG         |
| <b>IGHD</b>                | Ig delta chain C region       | IGHD        |
| <b>IGHM</b>                | Ig mu chain C region          | IGHM        |
| <b>PLTP</b>                | Phospholipid transfer protein | PLTP        |

*2. Membrane*

| Abbreviation                        | Protein name                                               | Gene Symbol |
|-------------------------------------|------------------------------------------------------------|-------------|
| <b>ABCA1</b>                        | ATP-binding cassette sub-family A member 1                 | ABCA1       |
| <b>Cholesterol plasma membrane</b>  | Cholesterol                                                | —           |
| <b>Fc gamma RI</b>                  | High affinity immunoglobulin gamma Fc receptor I           | FCGR1A      |
| <b>Fc gamma RIII beta</b>           | Low affinity immunoglobulin gamma Fc region receptor III-B | FCGR3B      |
| <b>Phospholipid plasma membrane</b> | Phospholipid                                               | —           |

*3. Cytoplasm*

| Abbreviation     | Protein name                       | Gene Symbol |
|------------------|------------------------------------|-------------|
| <b>ERK1/2</b>    | Mitogen-activated protein kinase 1 | MAPK1       |
| <b>LIPC (HL)</b> | Hepatic triacylglycerol lipase     | LIPC        |
| <b>LIPE</b>      | Endothelial lipase                 | LIPG        |

*4. Nucleus*

| Abbreviation     | Protein name                                    | Gene Symbol |
|------------------|-------------------------------------------------|-------------|
| <b>AP-1</b>      | Activator protein 1                             | JUN         |
| <b>ATF-2</b>     | Cyclic AMP-dependent transcription factor ATF-2 | ATF2        |
| <b>C/EBPbeta</b> | CCAAT/enhancer-binding protein beta             | CEBPB       |
| <b>c-Jun</b>     | Transcription factor AP-1                       | JUN         |

---

|                   |                                                                |         |
|-------------------|----------------------------------------------------------------|---------|
| <b>CREB-H</b>     | Cyclic AMP-responsive element-binding protein 3-like protein 3 | CREB3L3 |
| <b>HNF1-alpha</b> | Hepatocyte nuclear factor 1-alpha                              | HNF1A   |
| <b>HNF4-alpha</b> | Hepatocyte nuclear factor 4-alpha                              | HNF4A   |
| <b>STAT3</b>      | Signal transducer and activator of transcription 3             | STAT3   |
| <b>TGIF</b>       | Homeobox protein TGIF1                                         | TGIF1   |

---

**Supplementary Figure A. MetaCore Legend.** A legend for the network created in MetaCore suite shown in the Figures 3.

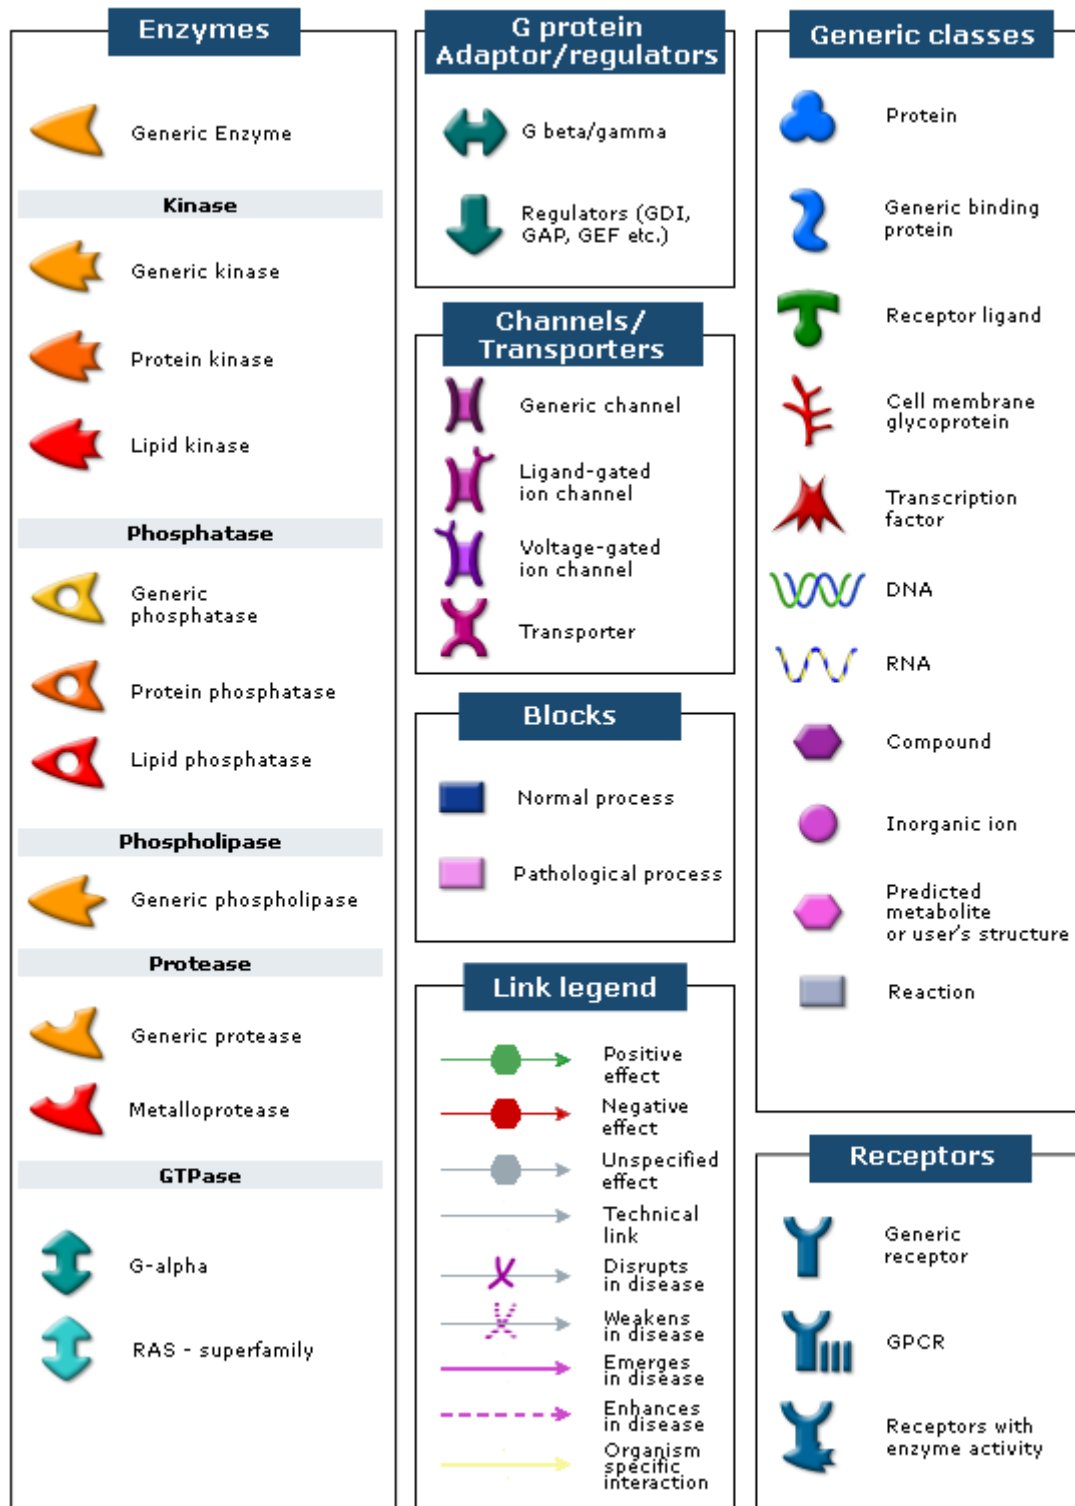

Supplement: f1 [file 863860.f1.pdf]
